# Supplementary material
Source: Royal Society of Chemistry journal article supplement (doi:10.1039/d5gc06936j)
Supplement: d5gc06936j1.pdf [file d5gc06936j1.pdf]

# Integrating Mechanochemical Synthesis of a Pyridinium-Based Graphitic Ionic Framework into an Eco-Friendly Gold Recycling Process

Zhi-Wei Liu,<sup>a,b</sup> Zhizhuo Yang,<sup>b</sup> Zhaoying Zhang,<sup>a</sup> Xilin Gao,<sup>b</sup> Chuanying Liu,<sup>\*a,b</sup>  
Chengliang Xiao<sup>\*a,b</sup>

<sup>a</sup> College of Chemical and Biological Engineering, Zhejiang University, Hangzhou 310058, China.

<sup>b</sup> Institute of Zhejiang University-Quzhou, Quzhou 324000, China

E-mail: [xiaoc@zju.edu.cn](mailto:xiaoc@zju.edu.cn); [cylu@zju.edu.cn](mailto:cylu@zju.edu.cn)

## Materials and reagents

Cyanuric chloride was purchased from Aldrich Sigma. Thiourea, N-bromosuccinimide, 2,4,6-tripyridin-4-yl-1,3,5-triazine, and solvents were purchased from Adamas-beta. Sodium Tetrachloroaurate(III) (NaAuCl<sub>4</sub>, 99% purity, Yuanye Reagent, Shanghai). All organic solvents are of anhydrous grade and used without further purification.

## Instruments and Characterization

Elemental analysis was performed using an Elementar Unicube elemental analyzer. Thermogravimetric analysis (TGA) was conducted on a Mettler-Toledo DSC 3 instrument with a heating rate of 10°C/min under a nitrogen atmosphere. Fourier-transform infrared spectroscopy (FTIR) measurements were carried out on a Bruker INVENIO R spectrometer. Gas adsorption analysis was performed using a Micromeritics 3FLEX instrument, with samples degassed at 80°C for 12 h before measurement. Solid-state nuclear magnetic resonance (NMR) spectroscopy was performed on a Bruker AVANCE NEO 600WB spectrometer operating at 600.41 MHz for 1 hour and 150.98 MHz for <sup>13</sup>C, equipped with a 3.2 mm probe. The <sup>13</sup>C cross-polarization with total suppression of spinning sidebands (CPTOSS) experiment was conducted at a magic angle spinning (MAS) rate of 10 kHz, with a recycle delay of 5 s and 720 scans. Chemical shifts were referenced to adamantane at 38.5 ppm. Field-emission scanning electron microscopy (FE-SEM) was conducted using a Hitachi

Regulus 8230 instrument equipped with an Oxford energy-dispersive X-ray spectroscopy (EDX) detector, with samples sputter-coated using an MC1000 gold coater. High-resolution transmission electron microscopy (HR-TEM) was performed on an FEI Talos F200X instrument, with samples prepared by dispersing the particles in anhydrous tetrahydrofuran (THF) via ultrasonication and depositing onto ultrathin copper grids. X-ray photoelectron spectroscopy (XPS) was conducted using a Kratos AXIS Supra<sup>+</sup> spectrometer. X-ray diffraction (XRD) measurements were performed on a Rigaku Ultima IV diffractometer equipped with a Cu K $\alpha_1$  radiation source ( $\lambda = 1.5406$  Å). Data were collected in the  $2\theta$  range of 5–60° with a scanning rate of 5° min<sup>-1</sup> under ambient conditions.

### **Equipment for the ball milling process**

Ball milling was conducted in a YXQM-0.4L planetary ball mill (Miqi Technology, Changsha, China). The ball milling jars are made of polytetrafluoroethylene (PTFE). The grinding balls are composed of agate with 8.0-mm diameters. The ball milling process is conducted at room temperature in air, while the loading process is carried out in a glove box. The ball milling jars are sealed with tape and tightly compressed to minimize air ingress.

### **Mechanochemical synthesis of GIF-4 in the planetary mill**

The synthesis was performed in a planetary ball mill using four PTFE jars operated in parallel. Each jar was charged with TCT (0.50 g, 2.71 mmol) and TPT (0.93 g, 2.98 mmol). The mixture was milled for 2 h, after which the crude product was washed with anhydrous THF and subsequently purified by Soxhlet extraction (THF) for 24 h. The process afforded the target product in 64.8 % isolated yield, corresponding to a total product mass of 3.51 g per batch.

To quantitatively assess the production efficiency of the mechanochemical synthesis, the space-time yield (STY) was calculated as a key metric for evaluating scalability and process intensification. The STY, defined as the mass of product obtained per unit reactor volume per unit time, was determined based on the following equation:

$$\text{STY} = m_p / (V_e \times t) \quad (6)$$

Where STY is the space–time yield (g·L<sup>-1</sup>·h<sup>-1</sup>),  $m$  is the total mass of product obtained per batch (g),  $V_e$  is the total effective reactor volume (L),  $t$  is the reaction time (h).

### Gold adsorption isotherms with GIF-4

The adsorption isotherms were investigated as follows: 10 mg of the GIF-4 material were added to a set of solutions with varying volumes (5, 6, 8, 10, 12, 14, and 15 mL) of a gold solution with an initial concentration of 1000 ppm (pH = 3.4). The suspensions were then stirred at room temperature for 12 h to ensure the adsorption equilibrium was reached. After the equilibration period, the mixtures were centrifuged to separate the solid adsorbent from the liquid phase. The supernatant was subsequently filtered through a 0.22  $\mu\text{m}$  membrane filter. The concentration of Au(III) was determined by ICP-OES.

The adsorption capacity at equilibrium  $Q_e$  (mg/g), was calculated using the following equation:

$$Q_e = (C_0 - C_e) V / m \quad (1)$$

Where  $C_0$  is the initial concentration of Au (ppm),  $C_e$  is the equilibrium concentration,  $V$  is the volume of the solution (L),  $m$  is the mass of the adsorbent GIF-4 (g). The equilibrium adsorption capacity  $Q_e$  versus the equilibrium concentration  $C_e$  was fitted with the Langmuir and the Freundlich isotherm models.

### Gold adsorption kinetics with GIF-4

A precisely weighed mass (50 mg) of GIF-4 was introduced into a 50 mL aliquot of 20 ppm Au(III) solution ( $\text{NaAuCl}_4$ ). The resulting suspension was agitated at room temperature and 150 rpm. At predetermined time intervals (0.5–30 min), 1.0 mL aliquots of supernatant were withdrawn, diluted five-fold with deionized water, and filtered through a 0.22  $\mu\text{m}$  syringe filter. The remaining Au(III) concentration ( $C_t$ ) in the filtrate was then determined by ICP-OES. The removal efficiency ( $RE$ ) is calculated based on the following equation:

$$RE = \frac{C_0 - C_t}{C_0} \times 100\% \quad (2)$$

where  $C_0$  ( $\text{mg L}^{-1}$ ) is the initial concentration,  $C_t$  ( $\text{mg L}^{-1}$ ) is the concentration at the desired time. The experiments were replicated three times.

### Langmuir Isotherm Model

The Langmuir model assumes monolayer adsorption onto a surface with a finite number

of active sites. It is expressed by the following equation,

$$Q_e = Q_m K_L C_e / (1 + K_L C_e) \quad (3)$$

The linear equation is expressed as follows,

$$\frac{C_e}{Q_e} = \frac{C_e}{Q_m} + \frac{1}{K_L Q_m} \quad (4)$$

where  $Q_m$  is the maximum adsorption capacity ( $\text{mg g}^{-1}$ ),  $K_L$  is the Langmuir constant related to the affinity of binding sites ( $\text{L mg}^{-1}$ ).

### **Freundlich isotherm model**

The Freundlich model is an empirical equation for heterogeneous surfaces and multilayer adsorption. It is expressed by the following equation,

$$Q_e = K_F C_e^{1/n} \quad (5)$$

The linear form of the Freundlich equation is expressed as follows,

$$\ln Q_e = \ln K_F + \frac{1}{n} \ln C_e \quad (6)$$

where  $K_F$  is the Freundlich constant indicative of the adsorption capacity ( $(\text{mg/g})/(\text{mg/L})^{1/n}$ ),  $1/n$  is the heterogeneity factor, an empirical constant related to adsorption intensity.

### **Kinetic models fitting.**

Linear forms of Lagergren pseudo-first-order and pseudo-second-order kinetic models were applied here. The first-order linear equation is expressed as follows.

$$\ln(Q_e - Q_t) = \ln Q_e - k_1 t \quad (7)$$

The second-order linear equation is expressed as follows.

$$\frac{t}{Q_t} = \frac{1}{k_2 Q_e^2} + \frac{t}{Q_e} \quad (8)$$

where  $Q_e$  and  $Q_t$  are the adsorption amount ( $\text{mg g}^{-1}$ ) at equilibrium and time  $t$  (min), respectively,  $k_1$  is the rate constant ( $\text{min}^{-1}$ ) of the pseudo-first-order kinetics model, and  $k_2$  is the rate constant ( $\text{g (mg min)}^{-1}$ ) of the pseudo-second-order kinetics model. The plots of  $\ln(Q_e - Q_t)$  versus  $t$  for the pseudo-first-order equation and  $t/Q_t$  versus  $t$  for the pseudo-second-order equation were tried.

### **Adsorption with $[\text{AuBr}]_4^-$ as the adsorbate.**

The experimental procedure was carried out as follows: 10 mg of GIF-4 was added to 10 mL of a 1000 ppm  $[\text{AuBr}_4]^-$  solution (pH adjusted to 3.8). The mixture was stirred continuously for 12 hours at room temperature. Subsequently, the solid was separated from the liquid phase via centrifugation and filtration. The concentration of gold in the resulting solution was then analysed with ICP-OES.

#### **Selectivity in competing cations.**

To evaluate cation selectivity, 20 mg of GIF-4 was added to 10 mL of a mixed-metal ion solution containing 20 ppm Au(III) and 100 ppm of each competing cation. The mixture was stirred for 6 hours at room temperature. Subsequently, the solid was separated by centrifugation, and the supernatant was filtered through a 0.22  $\mu\text{m}$  membrane filter. The concentrations of Au and all competing cations in the filtrate were then determined separately via ICP-OES.

#### **Selectivity in competing anions.**

To evaluate anion selectivity, 50 mg of GIF-4 was added to 10 mL of an Au(III) solution (20 ppm) containing competing anions ( $\text{Cl}^-$ ,  $\text{NO}_3^-$ ,  $\text{SO}_4^{2-}$ ) at concentrations ranging from 50- to 1000-fold molar excess relative to Au(III). The mixture was stirred for 6 hours at room temperature. Subsequently, the solid was separated by centrifugation, and the supernatant was filtered through a 0.22  $\mu\text{m}$  membrane filter. The concentrations of Au and all competing anions in the filtrate were then determined separately via ICP-OES.

#### **The regeneration efficiency and cycling stability.**

The regeneration efficiency and cycling stability of GIF-4 material were evaluated through sequential adsorption-desorption cycles. In each cycle, 50 mg of GIF-4 was dispersed in 10 mL of a 20 ppm Au(III) solution and stirred for 30 min at room temperature to achieve adsorption equilibrium. The loaded material was then separated via centrifugation and transferred into 20 mL of a stripping agent composed of 0.2 M HCl and 0.2 M thiourea, where it was stirred for 12 h at room temperature to desorb the gold. Following desorption, the regenerated GIF-4 was centrifuged and washed thoroughly: first three times with deionized water, then soaked in THF for 6 h, and finally rinsed twice again with deionized water. After washing, the material was dried under vacuum at 60°C for 12 h before being reused in the next adsorption cycle. This process was repeated over five cycles to assess the material's recovery performance.

#### **NBS/H<sub>2</sub>O solution for gold leaching.**

Gold can be efficiently leached from SIM cards using the following procedure: a defined quantity of SIM cards (e.g., 50 chips) is immersed in 100 mL of an aqueous NBS solution (0.084 M). The pH is adjusted to between 2 and 4, and the mixture is stirred at room temperature for 2–5 min. Once the leaching is complete, the processed cards are removed, and a new batch of SIM cards can be introduced to repeat the cycle. In the last run, an excess of sodium thiosulfate was added to remove the Br<sub>2</sub>, and the pH was adjusted to 3.8 for the following adsorption experiment.

#### **Extraction of gold from e-waste leachate with GIF-4.**

1.0 g of GIF-4 was added to the gold-containing NBS/H<sub>2</sub>O leaching solution. The pH of the mixture was adjusted to ca. 3.8, followed by stirring at room temperature for 6 h. Finally, the concentration of Au, Cu, and Ni in the solution was measured to determine the removal efficiency.

#### **Leaching SIM cards with aqua regia.**

Ten SIM cards were placed in a 250 mL flask, to which 15 mL of aqua regia (HCl:HNO<sub>3</sub> = 3:1, v/v) was added. The mixture was stirred for 1 hour at room temperature. Subsequently, the solution was diluted to a total volume of 100 mL with deionized water. After initial filtration through filter paper, the leachate was further filtered using a 0.22 μm membrane filter prior to the quantification of Au, Cu, and Ni concentrations via ICP-MS/AAS.

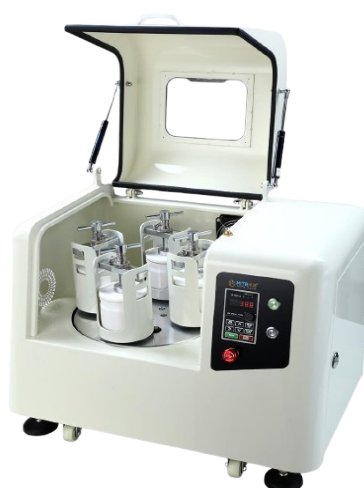

**Figure S1.** Photograph of the planetary ball mill

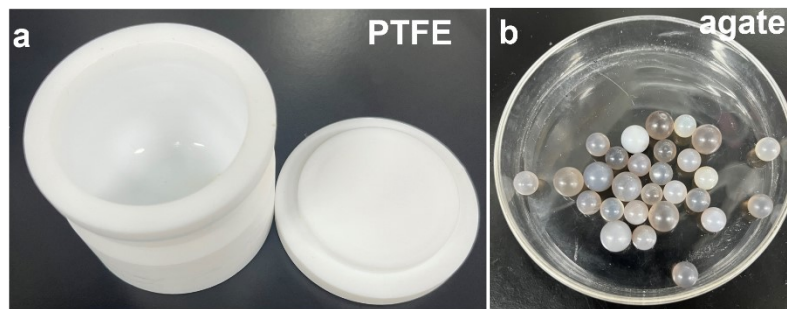

**Figure S2.** (a) 100 mL PTFE jar with the (b) agate balls

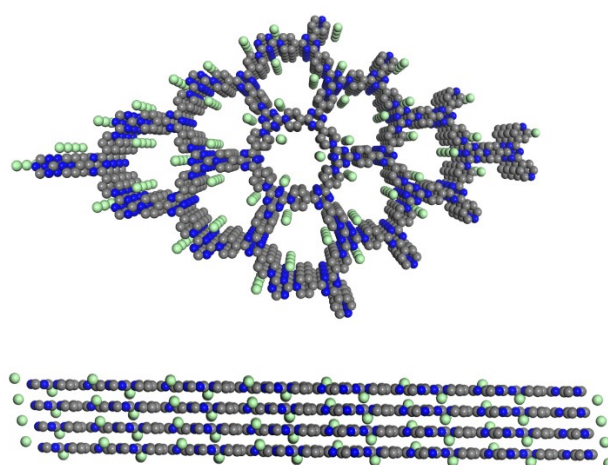

**Figure S3.** Simulated AA configuration of GIF-4.

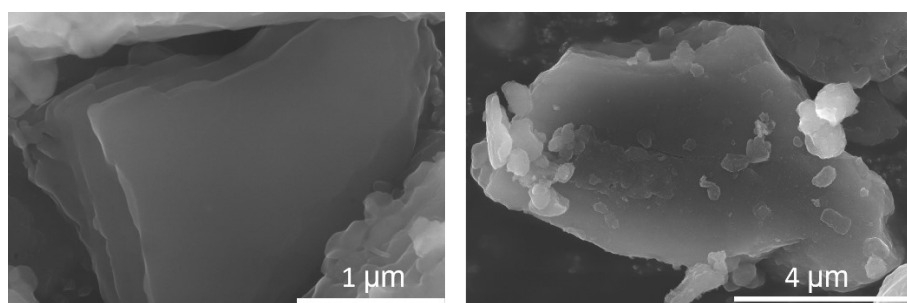

**Figure S4** SEM images of GIF-4 showing the layered structure.

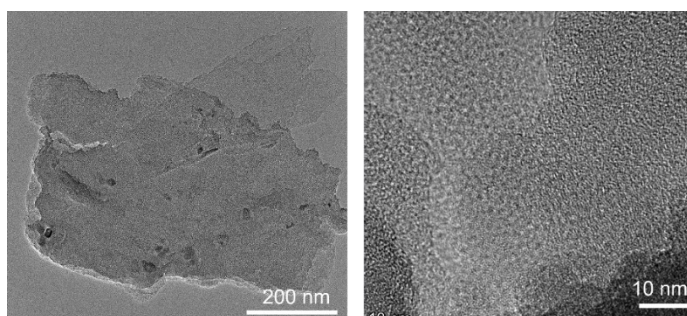

**Figure S5** TEM images of GIF-4.

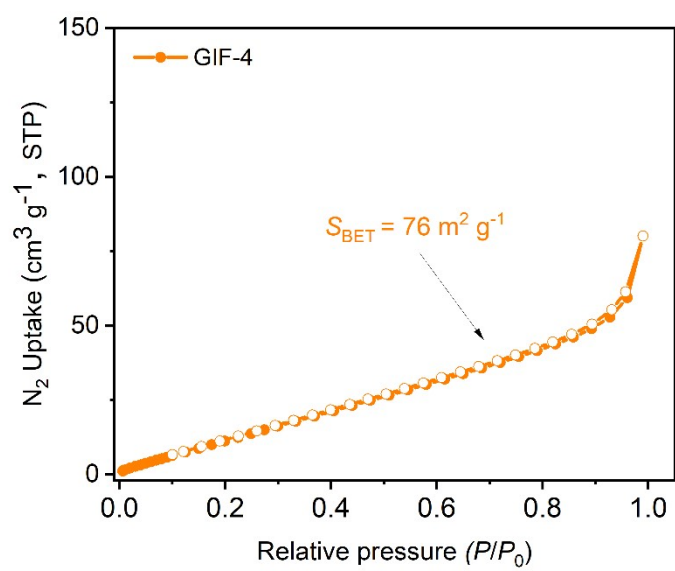

**Figure S6.** Nitrogen adsorption isotherm for the analysis of porous structure.

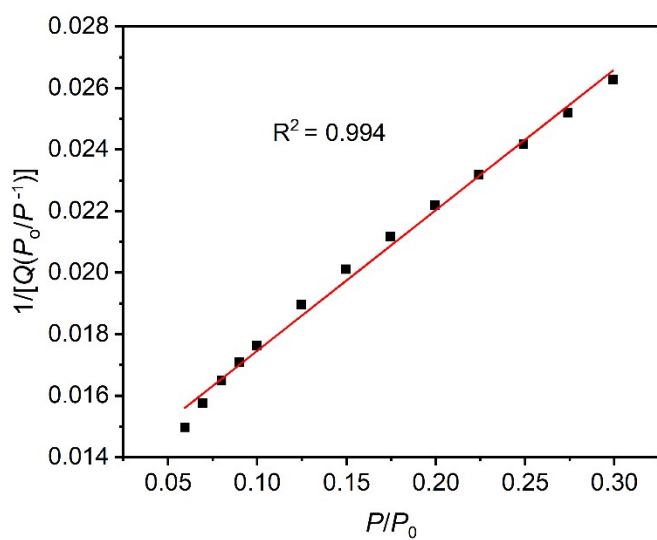

**Figure S7.** Curve for the calculation of the BET specific surface area.

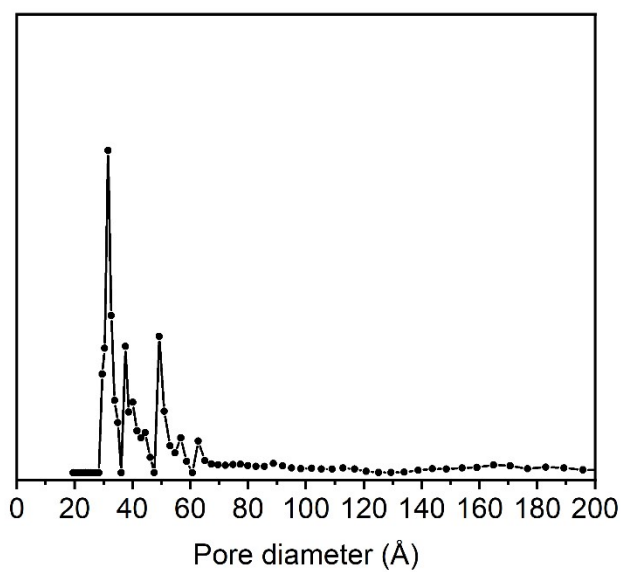

**Figure S8.** Pore size distribution of GIF-4.

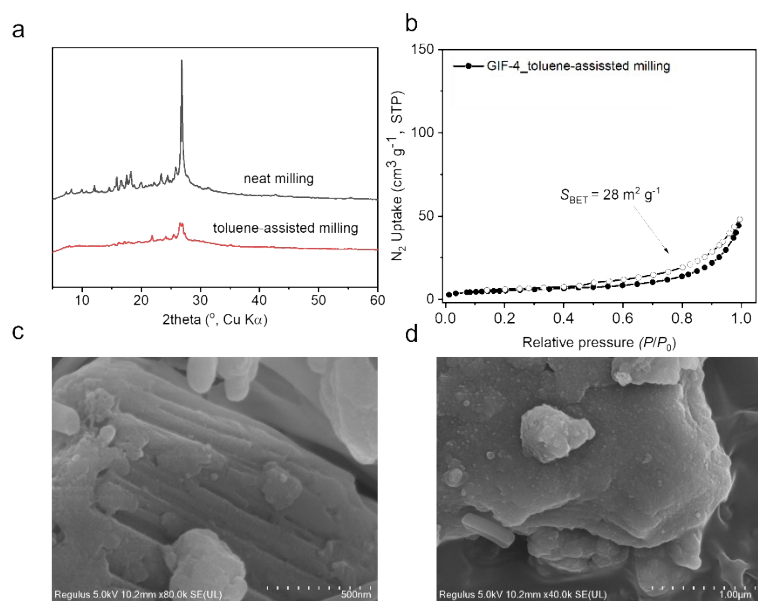

**Figure S9.** Characterization of GIF-4 synthesized via toluene-assisted grinding. (a) XRD patterns comparing neat-milling (black) and toluene-assisted milling (red) samples. (b) N<sub>2</sub> adsorption-desorption isotherm (77 K) of GIF-4 prepared by toluene-assisted milling. (c, d) SEM images illustrating the morphology of the toluene-assisted milled GIF-4.

**Table S1.** Elemental analysis of GIF-4.

| Item         | C (wt%) | H (wt%) | N (wt%) | C/N |
|--------------|---------|---------|---------|-----|
| Calculated   | 50.6    | 2.83    | 25.2    | 2.0 |
| Experimental | 55.3    | 4.4     | 24.3    | 2.3 |

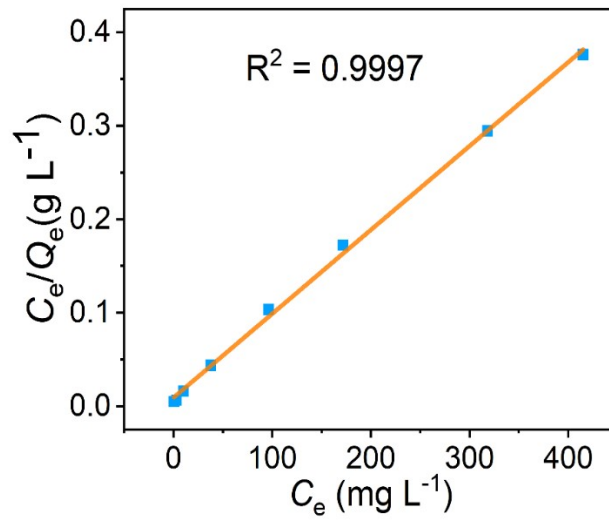

**Figure S10.** Fitting of the linear Langmuir model.

**Table S2.** Parameters of the Langmuir model fitting.

| Parameters | Values    |
|------------|-----------|
| $Q_m$      | 1110.2 mg |
| $K_L$      | 0.32 L/mg |
| $R^2$      | 0.9997    |

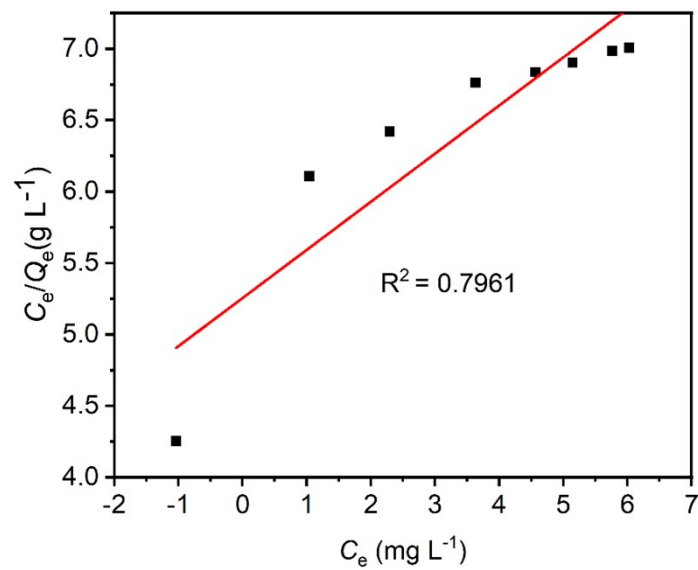

**Figure S11.** Fitting of the linear Freundlich model.

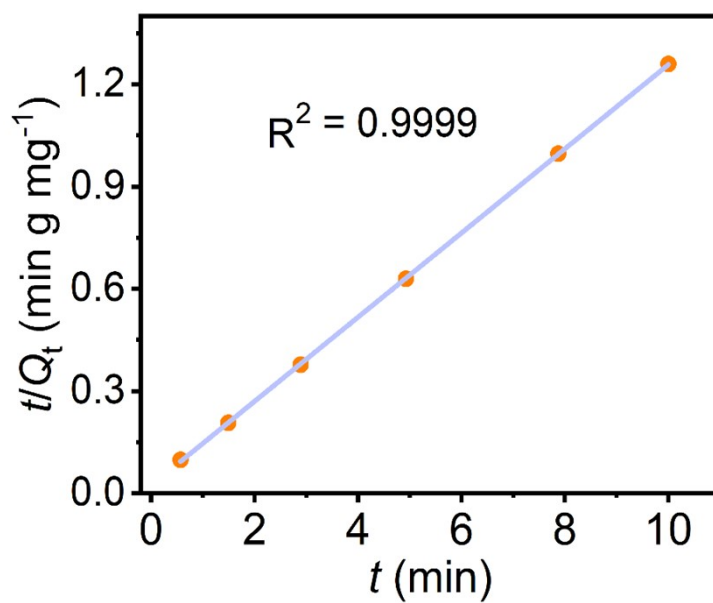

**Figure S12.** Fitting of the linear PSO model.

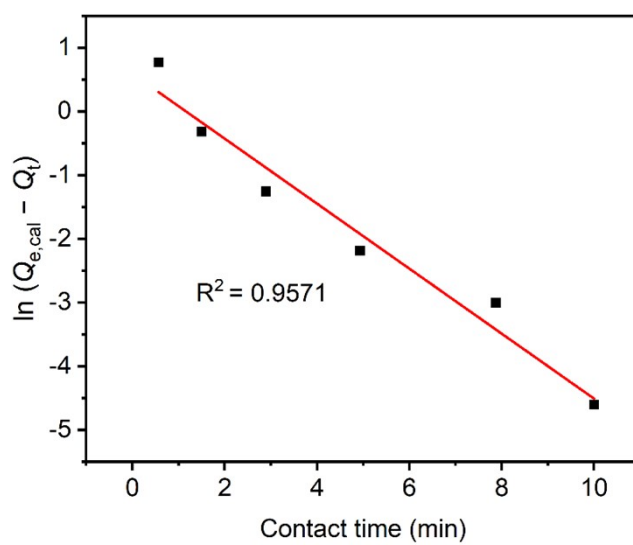

**Figure S13.** Fitting of the linear Pseudo-First-Order model.

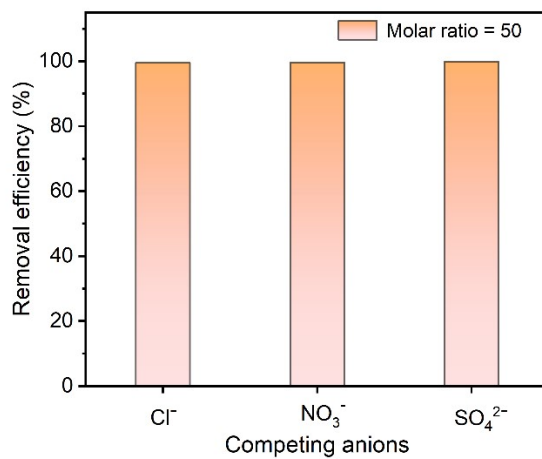

**Figure S14.** Anion selectivity measured with a 50-fold molar excess of competing ions.

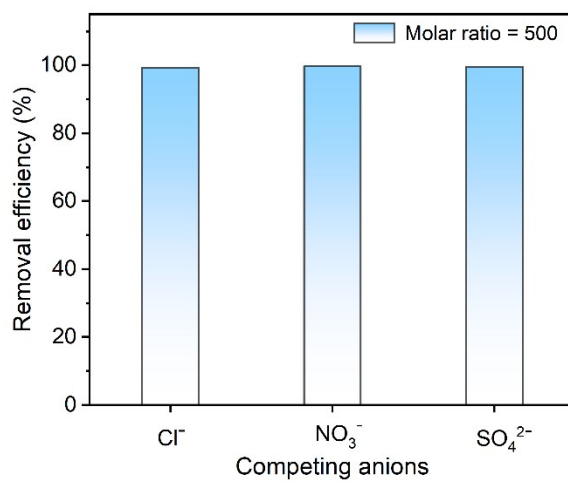

**Figure S15.** Anion selectivity measured with a 500-fold molar excess of competing ions.

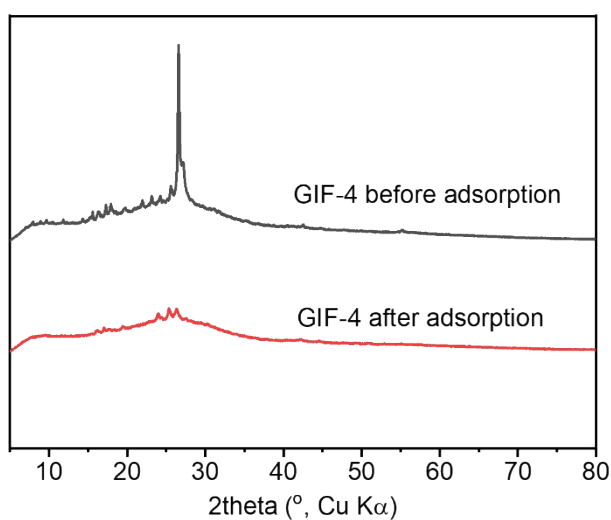

**Figure S16.** PXRD patterns of GIF-4 before (black) and after (red) gold adsorption.

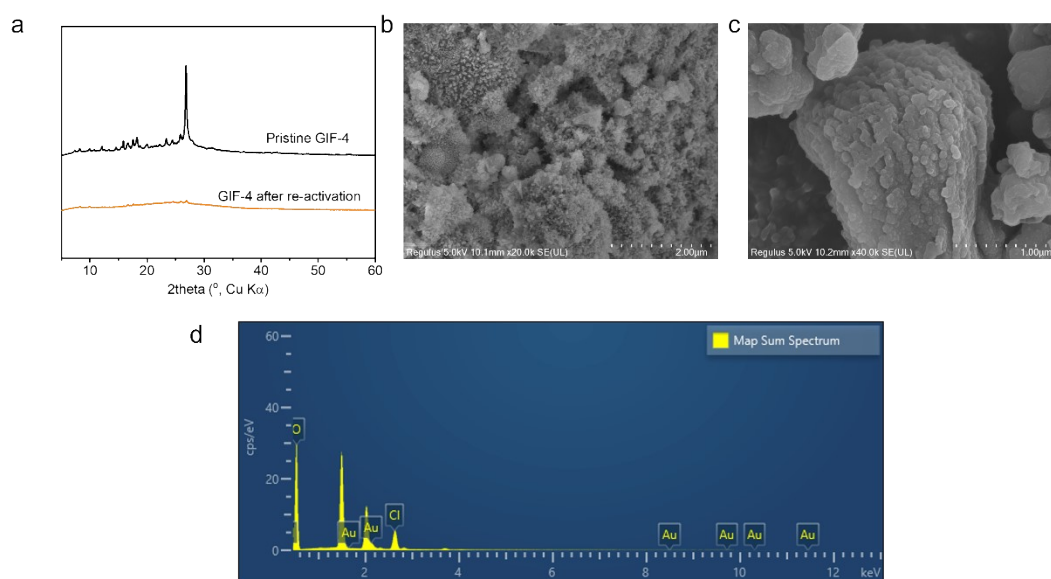

**Figure S17.** Characterization of the reactivated GIF-4 material after gold desorption: (a) PXRD pattern showing no characteristic peaks of metallic gold; (b, c) SEM image revealing morphological changes; (d) EDS spectrum indicating residual trace gold.

**Table S3.** Comparison of Au(III) adsorption performance between ionic/functionalized COFs/MOFs.

| Material                   | Type                                   | $Q_{\max}$<br>( $\text{mg}\cdot\text{g}^{-1}$ ) | Equilibrium<br>Time | Selectivity / Features                                                                 | Synthesis<br>Conditions                        | Refs                 |
|----------------------------|----------------------------------------|-------------------------------------------------|---------------------|----------------------------------------------------------------------------------------|------------------------------------------------|----------------------|
| UiO-67-<br>MAA             | Defective<br>MOF                       | 2253.2                                          | 10 min              | High selective<br>recovery from<br>wastewater                                          | One-step solvent<br>method, 120 °C,<br>24 h    | 1                    |
| Ionic-nano-<br>COFA        | Amide-<br>linked Ionic<br>nano-COF     | 1334                                            | Fast                | Stable in acidic E-<br>waste                                                           | Solvothermal,<br>120 °C, 3 days                | 2                    |
| im-PYTA-<br>PZDH-<br>COF   | Imidazopyri-<br>dinium-<br>linked COF  | 1558                                            | 10 min              | 95% uptake in 10 min                                                                   | Solvothermal,<br>120 °C, 3 days                | 3                    |
| TpTGCl<br>(Nanopape-<br>r) | Guanidinium<br>-based COF              | 1794                                            | Fast                | High efficiency in<br>CPU leaching                                                     | Solvothermal,<br>120 °C, 3 days                | 4                    |
| Imi-<br>PPOPs-Br           | Cationic<br>Porphyrin<br>POP           | 1543                                            | Fast                | Specific to $\text{AuCl}_4^-$                                                          | Bottom-up<br>synthesis, 180<br>°C, 72 h        | 5                    |
| V-PPOP-<br>Br              | Viologen-<br>linked<br>Cationic<br>POP | 1103                                            | N/A                 | High selectivity                                                                       | Solvothermal,<br>120 °C, 72 h                  | 6                    |
| UiO-66-<br>SPA             | Carboxypyri-<br>dine-func.<br>MOF      | 1004                                            | 40 min              | 2.65x higher than<br>non-func. UiO-66                                                  | Post-synthetic<br>modification, 80<br>°C, 12 h | 7                    |
| Fe-<br>BTC/PPPD<br>A       | MOF/Polym-<br>er Composite             | 934                                             | ~2 min              | Selective trace<br>extraction                                                          | In situ<br>polymerization,<br>70 °C            | 8                    |
| Zr-MOF<br>(Piperazine<br>) | Piperazine-<br>based MOF               | 900                                             | N/A                 | High stability in<br>acidic media                                                      | Solvothermal,<br>120 °C                        | 9                    |
| DUT-67-<br>TMA             | Thiophene-<br>func. MOF<br>on Fabric   | 586                                             | 60 min              | Passive sampling &<br>recovery                                                         | Solvothermal,<br>120 °C, 24 h                  | 10                   |
| <b>GIF-4</b>               | <b>Pyridium</b>                        | <b>1110</b>                                     | <b>10 min</b>       | <b>Highly selective for<br/><math>\text{AuCl}_4^-</math> over<br/>competing anions</b> | <b>Mechanochemi-<br/>cal synthesis,<br/>2h</b> | <b>This<br/>work</b> |

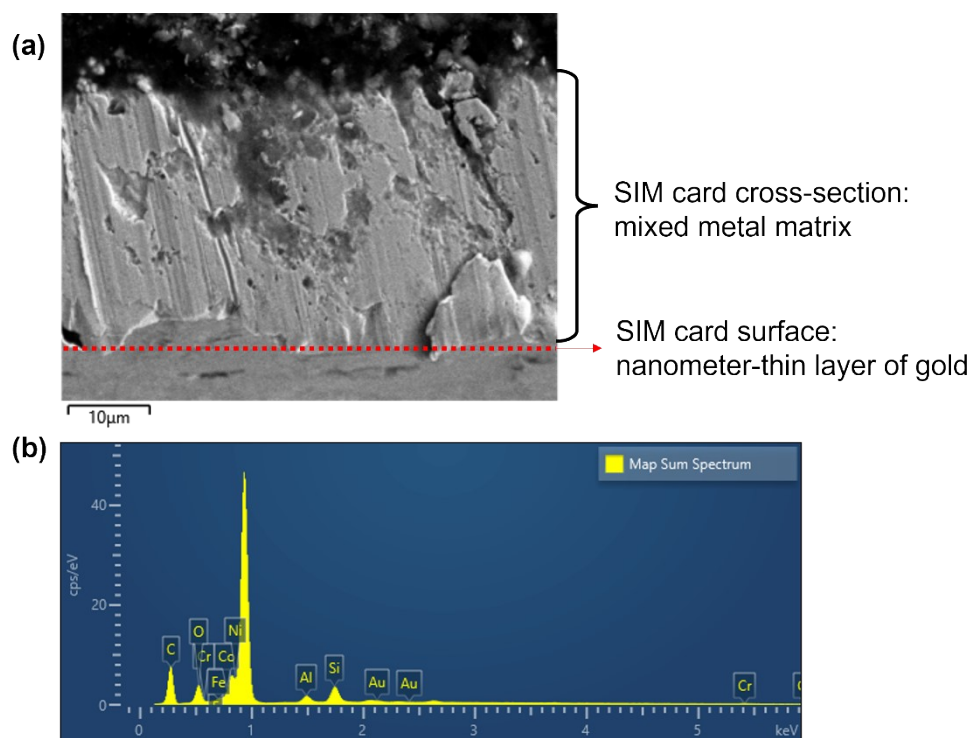

**Figure S18.** (a) SEM image of the cross-section of the SIM card chips, (b) the corresponding EDS analysis of the cross-section of SIM card.

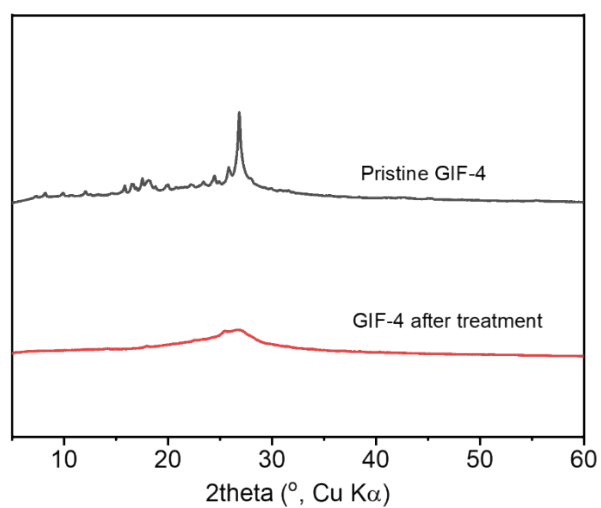

**Figure S19.** PXRD comparison of GIF-4 after treatment with NBS/H<sub>2</sub>O leachate.

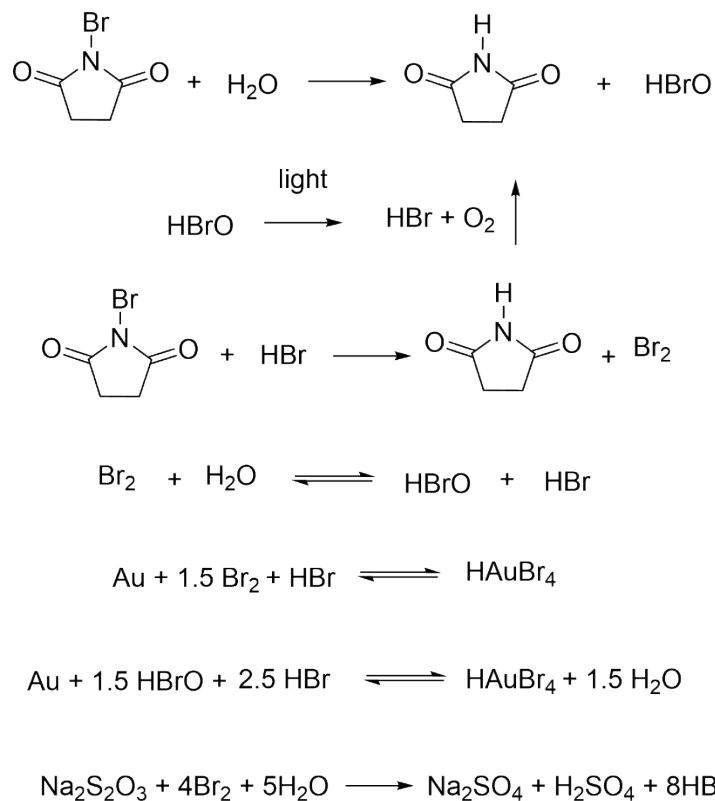

**Figure S20.** Proposed reaction mechanisms of gold leaching with NBS in aqueous solution<sup>11-13</sup>.

**Table S4.** ABC classification criteria for the Biber–Heinzle environmental assessment method.

| Impact Group (IG) | Impact Category (IC)      | Input (I)/Output (O) | Class A (high concern)                                  | Class B (medium concern)                                | Class C (low/negligible concern)           |
|-------------------|---------------------------|----------------------|---------------------------------------------------------|---------------------------------------------------------|--------------------------------------------|
| Resources         | Raw Material Availability | I                    | Only fossil-based; predicted exhaustion within 30 years | Only fossil-based; predicted exhaustion in 30–100 years | Renewable, or guaranteed supply >100 years |
| Grey Inputs       | Complexity of Synthesis   | I                    | >10 synthesis steps                                     | 3–10 synthesis steps                                    | <3 synthesis steps                         |
| Grey Inputs       | Critical Materials Used   | I                    | Critical materials (heavy metals, AOX, PCB) used or     | Critical materials involved in                          | No critical compounds                      |

|                       |                                               |     |                                                                                                                |                                                                                                   |                                                                                                   |
|-----------------------|-----------------------------------------------|-----|----------------------------------------------------------------------------------------------------------------|---------------------------------------------------------------------------------------------------|---------------------------------------------------------------------------------------------------|
|                       |                                               |     | produced in stoichiometric amounts.                                                                            | substoichiometric amounts                                                                         | involved                                                                                          |
| <b>Organisms</b>      | Acute Toxicity                                | I/O | EU T <sup>+</sup> ; R26–28,32,50; LD <sub>50</sub> oral <25 mg/kg; LC <sub>50</sub> inh <200 mg/m <sup>3</sup> | EU T, Xn, Xi; LD <sub>50</sub> oral 25–200 mg/kg; LC <sub>50</sub> inh 200–2000 mg/m <sup>3</sup> | No acute toxicity; LD <sub>50</sub> oral >200 mg/kg; LC <sub>50</sub> inh >2000 mg/m <sup>3</sup> |
| <b>Organisms</b>      | Chronic Toxicity                              | I/O | MAK <1 mg/m <sup>3</sup> ; IARC 1,2A; R45–49,60,61                                                             | MAK 1–10 mg/m <sup>3</sup> ; IARC 2B,3; R33,40,62,63                                              | MAK >10 mg/m <sup>3</sup> ; IARC 4                                                                |
| <b>Organisms</b>      | Endocrine Disruption Potential                | I/O | — (not defined)                                                                                                | Scientifically proved or suspected endocrine effect                                               | No known hormonal effect                                                                          |
| <b>Component Risk</b> | Thermal Risk (flammability/reactivity)        | I/O | Flash point <38 °C; or explosive; NFPA F+R 3–4                                                                 | Flash point 38–100 °C; NFPA F+R 2                                                                 | Flash point >100 °C; stable; NFPA F+R 0–1                                                         |
| <b>Air</b>            | Global Warming Potential (GWP)                | O   | GWP >20                                                                                                        | GWP <20                                                                                           | No GWP                                                                                            |
| <b>Air</b>            | Ozone Depletion Potential (ODP)               | O   | ODP >0.5                                                                                                       | ODP <0.5                                                                                          | No ODP                                                                                            |
| <b>Air</b>            | Acidification Potential (AP)                  | O   | AP >0.5                                                                                                        | AP <0.5                                                                                           | No AP                                                                                             |
| <b>Air</b>            | Photochemical Ozone Creation Potential (POCP) | O   | POCP >30 or NO <sub>x</sub>                                                                                    | 2 < POCP <30                                                                                      | POCP <2 or no effect known                                                                        |
| <b>Air</b>            | Odour                                         | O   | — (not defined)                                                                                                | Odour threshold <300 mg/m <sup>3</sup>                                                            | Odour threshold >300 mg/m <sup>3</sup> or no odour                                                |
| <b>Water/Soil</b>     | Eutrophication Potential (EP)                 | O   | N-content >0.2 or P-content >0.05 (mass fraction)                                                              | N-content <0.2 and P-content <0.05                                                                | Contains neither N nor P                                                                          |
| <b>Water/Soil</b>     | Organic Carbon Pollution Potential (OCPP)     | O   | — (not defined)                                                                                                | ThOD or COD >0.2 g O <sub>2</sub> /g substrate                                                    | ThOD and COD <0.2 g O <sub>2</sub> /g substrate; or non-organic                                   |

**Table S5.** Biwer-Heinzle method<sup>14</sup> for input environmental evaluation.

| Component                                       | CAS No.    | Role              | Resources | Grey Inputs | Organisms | Component Risk | EF_MW | EF_Mult | MI (kg/Au)* | EI_MW       | EI_Mult    |
|-------------------------------------------------|------------|-------------------|-----------|-------------|-----------|----------------|-------|---------|-------------|-------------|------------|
| <b>SIM Cards</b>                                | N/A        | Gold source       | <b>B</b>  | <b>C</b>    | <b>C</b>  | <b>C</b>       | 0.08  | 1.3     | 372         | 29.8        | 484        |
| <b>NBS</b>                                      | 128-08-5   | Oxidant precursor | B         | B           | B         | B              | 0.30  | 2.86    | 0.124       | 0.037       | 0.355      |
| <b>HBr</b>                                      | 10035-10-6 | Complexing agent  | B         | C           | A         | C              | 0.33  | 5.2     | 0.093       | 0.031       | 0.484      |
| <b>Br<sub>2</sub></b>                           | 7726-95-6  | Active oxidant    | B         | C           | A         | A              | 0.58  | 20.8    | 0.111       | 0.064       | 2.31       |
| <b>Na<sub>2</sub>S<sub>2</sub>O<sub>3</sub></b> | 7772-98-7  | Quenching agent   | B         | C           | C         | C              | 0.08  | 1.3     | 0.027       | 0.002       | 0.035      |
| <b>TCT</b>                                      | 108-77-0   | GIF-4 precursor 1 | B         | B           | A         | A              | 0.58  | 20.8    | 1.06        | 0.615       | 22.0       |
| <b>TPT</b>                                      | 42333-78-8 | GIF-4 precursor 2 | B         | B           | B         | B              | 0.30  | 2.86    | 1.80        | 0.540       | 5.15       |
| <b>TOTAL INPUT</b>                              |            |                   |           |             |           |                |       |         | <b>375</b>  | <b>31.1</b> | <b>514</b> |

**Table S6.** Biwer-Heinzle method<sup>14</sup> for output environmental evaluation.

| Component                           | CAS No.    | Role               | Air | Water/Soil | Organisms | Component Risk | EF_MW | EF_Mult | MI (kg/Au)* | EI_MW | EI_Mult |
|-------------------------------------|------------|--------------------|-----|------------|-----------|----------------|-------|---------|-------------|-------|---------|
| <b>HAuBr<sub>4</sub></b>            | 37088-67-8 | Target product     | C   | B          | A         | C              | 0.33  | 5.2     | 0.240       | 0.079 | 1.25    |
| <b>GIF-4</b>                        | N/A        | Adsorption carrier | C   | C          | C         | C              | 0     | 1.0     | 2.86        | 0     | 2.86    |
| <b>Na<sub>2</sub>SO<sub>4</sub></b> | 7757-82-6  | Byproduct          | C   | C          | C         | C              | 0     | 1.0     | 0.025       | 0     | 0.025   |
| <b>HBr</b>                          | 1003       | Residual           | C   | C          | A         | CC             | 0.25  | 4.0     | 0.10        | 0.026 | 0.412   |

|                       |           |            |   |   |   |   |      |      |             |              |             |  |
|-----------------------|-----------|------------|---|---|---|---|------|------|-------------|--------------|-------------|--|
|                       | 5-10-6    | Br-species |   |   |   |   |      |      |             | 3            |             |  |
| <b>Succinimide</b>    | 123-56-8  | Byproduct  | C | B | B | C | 0.15 | 1.69 | 0.06        | 0.010        | 0.117       |  |
| <b>H<sub>2</sub>O</b> | 7732-18-5 | Byproduct  | C | C | C | C | 0    | 1.0  | 0.01        | 0            | 0.013       |  |
| <b>TOTAL OUTPUT</b>   |           |            |   |   |   |   |      |      | <b>3.31</b> | <b>0.115</b> | <b>4.68</b> |  |

**Table S7.** Complete mass balance summary

| <b>Component</b>                                | <b>Role</b>         | <b>Mass (g)</b> | <b>MI (kg/kg Au)</b> | <b>EF_Mult</b> | <b>EI_Mult</b> |
|-------------------------------------------------|---------------------|-----------------|----------------------|----------------|----------------|
| <b>Inputs</b>                                   |                     |                 |                      |                |                |
| <b>SIM Cards</b>                                | Gold source         | 20.5            | 372                  | 1.3            | 484            |
| <b>NBS</b>                                      | Oxidant precursor   | 0.0068          | 0.124                | 2.86           | 0.355          |
| <b>HBr</b>                                      | Complexing agent    | 0.0051          | 0.093                | 5.2            | 0.484          |
| <b>Br<sub>2</sub></b>                           | Active oxidant      | 0.0061          | 0.111                | 20.8           | 2.31           |
| <b>Na<sub>2</sub>S<sub>2</sub>O<sub>3</sub></b> | Quenching agent     | 0.0015          | 0.027                | 1.3            | 0.035          |
| <b>TCT</b>                                      | GIF-4 precursor 1   | 0.0586          | 1.06                 | 20.8           | 22.0           |
| <b>TPT</b>                                      | GIF-4 precursor 2   | 0.0992          | 1.80                 | 2.86           | 5.15           |
| <b>Total Input</b>                              |                     | <b>20.677</b>   | <b>375</b>           | —              | <b>514</b>     |
| <b>Outputs</b>                                  |                     |                 |                      |                |                |
| <b>HAuBr<sub>4</sub></b>                        | Target product      | 0.0132          | 0.240                | 5.2            | 1.25           |
| <b>GIF-4</b>                                    | Adsorption carrier  | 0.1578          | 2.86                 | 1.0            | 2.86           |
| <b>Na<sub>2</sub>SO<sub>4</sub></b>             | Byproduct           | 0.0014          | 0.025                | 1.0            | 0.025          |
| <b>HBr</b>                                      | Residual Br-species | 0.0057          | 0.103                | 4.0            | 0.412          |
| <b>Succinimide</b>                              | Byproduct           | 0.0038          | 0.069                | 1.69           | 0.117          |
| <b>H<sub>2</sub>O</b>                           | Byproduct           | 0.0007          | 0.013                | 1.0            | 0.013          |
| <b>Total Output</b>                             |                     | <b>0.1826</b>   | <b>3.31</b>          | —              | <b>4.68</b>    |

**Tables S8.** Final GEI calculation

| Parameter            | Input        | Output       |
|----------------------|--------------|--------------|
| MI_Process           | 375          | 3.31         |
| EI_Process (EF_MW)   | 31.1         | 0.115        |
| GEI_MW = EI/MI       | <b>0.083</b> | <b>0.035</b> |
| EI_Process (EF_Mult) | 514          | 4.68         |
| GEI_Mult = EI/MI     | <b>1.37</b>  | <b>1.41</b>  |

**Table S9.** Comparison of GEI values for different extraction methods

| Process          | GEI_MW<br>(Input) | GEI_MW<br>(Output) | GEI_Mult<br>(Input) | GEI_Mult<br>(Output) |
|------------------|-------------------|--------------------|---------------------|----------------------|
| <b>This work</b> | <b>0.083</b>      | <b>0.035</b>       | <b>1.37</b>         | <b>1.41</b>          |
| Chlorination     | 0.05              | 0.07               | 1.58                | 1.59                 |
| Cyanidation      | 0.10              | 0.13               | 2.21                | 2.68                 |
| Aqua regia       | 0.29              | 0.41               | 8.67                | 31.19                |

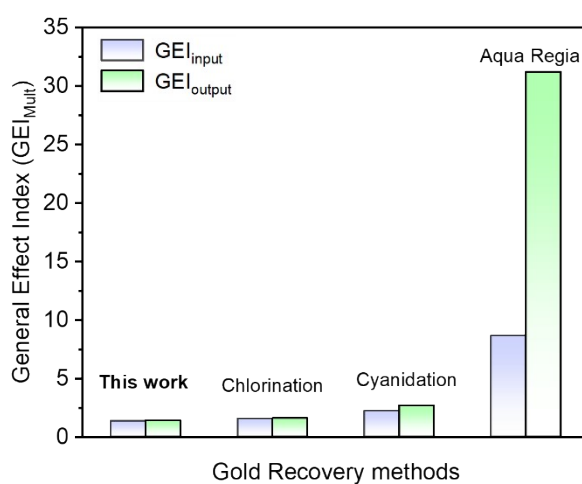

**Figure S21.** Comparison of quantitative environmental index  $GEI_{Mult}$  using the Biewer-Heinzle method.

**Table S10.** The atomic coordinate of GIF-4 with AA mode after Pawley refinement.

| <b>GIF-4, AA stacking</b>                                                       |          |          |          |
|---------------------------------------------------------------------------------|----------|----------|----------|
| Triclinic, <i>P</i> 1                                                           |          |          |          |
| a = 14.5848 Å, b = 14.5836 Å, c = 3.5829Å                                       |          |          |          |
| $\alpha = 88.1933^\circ$ , $\beta = 106.4870^\circ$ , $\gamma = 119.9959^\circ$ |          |          |          |
| <b>Atom</b>                                                                     | <b>x</b> | <b>y</b> | <b>z</b> |
| N1                                                                              | N        | 1.12028  | -6.13625 |
| C2                                                                              | C        | 1.066    | -6.24384 |
| N3                                                                              | N        | 1.12031  | -6.29712 |
| C4                                                                              | C        | 1.22796  | -6.24386 |
| N5                                                                              | N        | 1.28129  | -6.1362  |
| C6                                                                              | C        | 1.22795  | -6.08185 |
| N7                                                                              | N        | 1.28464  | -6.30086 |
| C8                                                                              | C        | 1.22844  | -6.40958 |
| C9                                                                              | C        | 1.28201  | -6.46636 |
| C10                                                                             | C        | 1.39449  | -6.41119 |
| C11                                                                             | C        | 1.45095  | -6.29982 |
| C12                                                                             | C        | 1.39439  | -6.24599 |
| C13                                                                             | C        | 1.45268  | -6.46956 |
| N14                                                                             | N        | 1.39915  | -6.57718 |
| C15                                                                             | C        | 1.45273  | -6.63129 |
| N16                                                                             | N        | 1.56055  | -6.57698 |
| C17                                                                             | C        | 1.61474  | -6.46943 |
| N18                                                                             | N        | 1.56048  | -6.41611 |
| C19                                                                             | C        | 1.39454  | -6.74786 |
| C20                                                                             | C        | 1.73154  | -6.41105 |
| C21                                                                             | C        | 1.78814  | -6.46541 |
| C22                                                                             | C        | 1.89879  | -6.40864 |
| N23                                                                             | N        | 1.95224  | -6.30072 |
| C24                                                                             | C        | 1.89809  | -6.2466  |
| C25                                                                             | C        | 1.78743  | -6.30045 |
| C26                                                                             | C        | 1.28201  | -6.80486 |

|      |    |         |          |
|------|----|---------|----------|
| C27  | C  | 1.22844 | -6.91524 |
| N28  | N  | 1.28467 | -6.96812 |
| C29  | C  | 1.39447 | -6.91355 |
| C30  | C  | 1.45104 | -6.80313 |
| Cl31 | Cl | 0.01639 | 0.97266  |
| Cl32 | Cl | 1.01898 | 0.50608  |
| Cl33 | Cl | 0.4881  | 0.96511  |

**Table S11.** The atomic coordinate of GIF-4 with AB mode after Pawley refinement.

| <b>GIF-4, AB stacking</b>                                                       |          |          |          |
|---------------------------------------------------------------------------------|----------|----------|----------|
| Triclinic, <i>P</i> 1                                                           |          |          |          |
| $a = 14.6811\text{\AA}$ , $b = 14.6895\text{\AA}$ , $c = 7.2386\text{\AA}$      |          |          |          |
| $\alpha = 87.8815^\circ$ , $\beta = 106.9264^\circ$ , $\gamma = 119.9600^\circ$ |          |          |          |
| <b>Atom</b>                                                                     | <b>x</b> | <b>y</b> | <b>z</b> |
| N1                                                                              | 0.17483  | 0.90441  | 0.67842  |
| C2                                                                              | 0.12082  | 0.79767  | 0.67928  |
| N3                                                                              | 0.17486  | 0.74468  | 0.68032  |
| C4                                                                              | 0.28196  | 0.7974   | 0.68164  |
| N5                                                                              | 0.33502  | 0.90422  | 0.68186  |
| C6                                                                              | 0.28196  | 0.95826  | 0.67985  |
| N7                                                                              | 0.33835  | 0.74071  | 0.68181  |
| C8                                                                              | 0.28244  | 0.63284  | 0.67032  |
| C9                                                                              | 0.33574  | 0.57638  | 0.6706   |
| C10                                                                             | 0.44765  | 0.63098  | 0.6827   |
| C11                                                                             | 0.50382  | 0.74149  | 0.69417  |
| C12                                                                             | 0.44754  | 0.79503  | 0.69342  |
| C13                                                                             | 0.50554  | 0.57294  | 0.68354  |
| N14                                                                             | 0.45228  | 0.46615  | 0.68277  |
| C15                                                                             | 0.50558  | 0.41234  | 0.68556  |
| N16                                                                             | 0.61286  | 0.46611  | 0.68828  |
| C17                                                                             | 0.66678  | 0.57281  | 0.68792  |
| N18                                                                             | 0.61279  | 0.62585  | 0.68614  |

|     |         |         |         |
|-----|---------|---------|---------|
| C19 | 0.4477  | 0.29668 | 0.68666 |
| C20 | 0.78297 | 0.63061 | 0.6901  |
| C21 | 0.83929 | 0.57654 | 0.69412 |
| C22 | 0.94938 | 0.63275 | 0.69634 |
| N23 | 1.00255 | 0.73982 | 0.6942  |
| C24 | 0.94868 | 0.79365 | 0.69063 |
| C25 | 0.83858 | 0.74034 | 0.68831 |
| C26 | 0.33574 | 0.24026 | 0.67429 |
| C27 | 0.28244 | 0.13073 | 0.67585 |
| N28 | 0.33838 | 0.07814 | 0.68931 |
| C29 | 0.44762 | 0.13215 | 0.70126 |
| C30 | 0.50391 | 0.24171 | 0.70023 |
| N31 | 0.80341 | 1.18965 | 1.21604 |
| C32 | 0.7494  | 1.08291 | 1.21689 |
| N33 | 0.80344 | 1.02992 | 1.21794 |
| C34 | 0.91054 | 1.08264 | 1.21926 |
| N35 | 0.9636  | 1.18946 | 1.21947 |
| C36 | 0.91054 | 1.2435  | 1.21747 |
| N37 | 0.96693 | 1.02595 | 1.21943 |
| C38 | 0.91102 | 0.91809 | 1.20794 |
| C39 | 0.96431 | 0.86162 | 1.20822 |
| C40 | 1.07622 | 0.91622 | 1.22032 |
| C41 | 1.1324  | 1.02673 | 1.23178 |
| C42 | 1.07612 | 1.08027 | 1.23103 |
| C43 | 1.13412 | 0.85818 | 1.22116 |
| N44 | 1.08086 | 0.75139 | 1.22039 |
| C45 | 1.13416 | 0.69758 | 1.22317 |
| N46 | 1.24144 | 0.75135 | 1.22589 |
| C47 | 1.29535 | 0.85805 | 1.22553 |
| N48 | 1.24137 | 0.91109 | 1.22376 |
| C49 | 1.07627 | 0.58192 | 1.22428 |
| C50 | 1.41155 | 0.91585 | 1.22771 |

|      |         |          |         |
|------|---------|----------|---------|
| C51  | 1.46787 | 0.86178  | 1.23174 |
| C52  | 1.57796 | 0.91799  | 1.23395 |
| N53  | 1.63113 | 1.02506  | 1.23182 |
| C54  | 1.57726 | 1.07889  | 1.22825 |
| C55  | 1.46716 | 1.02558  | 1.22593 |
| C56  | 0.96432 | 0.5255   | 1.21191 |
| C57  | 0.91102 | 0.41597  | 1.21346 |
| N58  | 0.96696 | 0.36338  | 1.22693 |
| C59  | 1.0762  | 0.41739  | 1.23888 |
| C60  | 1.13249 | 0.52695  | 1.23785 |
| Cl61 | 0.36937 | 0.16908  | 0.21504 |
| Cl62 | 0.83483 | 0.62834  | 0.27024 |
| Cl63 | 0.36595 | 0.62734  | 0.19679 |
| Cl64 | 0.70673 | -0.16821 | 0.75752 |
| Cl65 | 0.76498 | 0.35176  | 0.69711 |
| Cl66 | 1.25132 | 0.34411  | 0.78705 |

## Reference

- (1) Wang, Z.; Bao, Z.; Wang, X.; Xia, C.; Xu, D.; Wang, S.; Li, W. Regulator-induced defective functionalization of MOFs: Efficient recovery of gold ions from wastewater. *Journal of Materials Science & Technology* **2026**, *247*, 302-311.
- (2) Xiong, C.; Wang, Y.; Liang, K.; Wu, C.; Wu, W.; Chen, Q. Ionic Nanocovalent Organic Frameworks for Enhanced Gold Recovery from Electronic Wastewater. *ChemSusChem* **2025**, *18* (22), e202501155.
- (3) Yang, X.; Jiang, D.; Cheng, Y.; Fu, Y.; Li, X.; Liu, G.; Ding, X.; Han, B. H.; Xu, Q.; Zeng, G. Imidazopyridinium-Linked Covalent Organic Frameworks for Efficient Gold Recovery. *Small Methods* **2024**, *9* (7).
- (4) Xu, Q.; Du, X.-H.; Luo, D.; Strømme, M.; Zhang, Q.-F.; Xu, C. Gold recovery from E-waste using freestanding nanopapers of cellulose and ionic covalent organic frameworks. *Chemical Engineering Journal* **2023**, *458*.
- (5) Ding, R.; Liu, J.; Wang, T.; Zhang, X. Bottom-up synthesis of cationic porphyrin-based porous organic polymers for highly efficient and selective recovery of gold. *Chemical Engineering Journal* **2022**, *449*.
- (6) Chen, Y.; Li, Z.; Ding, R.; Liu, T.; Zhao, H.; Zhang, X. Construction of porphyrin and

viologen-linked cationic porous organic polymer for efficient and selective gold recovery. *J Hazard Mater* **2022**, *426*, 128073.

(7) Wang, X.; Wang, Z.; Xia, C.; Bao, Z.; Xu, D.; Ma, Y.; Wang, S.; Li, W. Carboxypyridine-Functionalized MOFs for Enhanced Au(III) Recovery. *Applied Organometallic Chemistry* **2025**, *39* (9).

(8) Sun, D. T.; Gasilova, N.; Yang, S.; Oveisi, E.; Queen, W. L. Rapid, Selective Extraction of Trace Amounts of Gold from Complex Water Mixtures with a Metal–Organic Framework (MOF)/Polymer Composite. *Journal of the American Chemical Society* **2018**, *140* (48), 16697-16703.

(9) Meoli, M.; Roth, J.; Stoian, D. C.; Belin, A. F. S.; Scopelliti, R.; Queen, W. L. Stable Zirconium-Piperazine Metal–Organic Frameworks for Efficient Gold Recovery. *Chemistry of Materials* **2026**, *38* (6), 2767-2777.

(10) Gouma, V.; Makri, E. C.; Andreou, E. K.; Buchsteiner, E.; Armatas, G. S.; Manos, M. J.; Giokas, D. L. An Amino-Thiophene Functionalized Metal–Organic Framework on Fabric for Selective Extraction, Recovery, and Passive Sampling of Gold Ions and Nanoparticles. *Chem Mater* **2025**, *37* (18), 7147-7158.

(11) Senanayake, G. Gold leaching in non-cyanide lixiviant systems: critical issues on fundamentals and applications. *Minerals Engineering* **2004**, *17* (6), 785-801.

(12) Yue, C.; Sun, H.; Liu, W.-J.; Guan, B.; Deng, X.; Zhang, X.; Yang, P. Environmentally Benign, Rapid, and Selective Extraction of Gold from Ores and Waste Electronic Materials. *Angewandte Chemie International Edition* **2017**, *56* (32), 9331-9335.

(13) Kim, E.-y.; Kim, M.-s.; Lee, J.-c.; Pandey, B. Selective recovery of gold from waste mobile phone PCBs by hydrometallurgical process. *Journal of hazardous materials* **2011**, *198*, 206-215.

(14) Wang, J.; Lu, Y.; Xu, Z. Identifying Extraction Technology of Gold from Solid Waste in Terms of Environmental Friendliness. *ACS Sustainable Chemistry & Engineering* **2019**, *7* (7), 7260-7267.
